# Supplementary material
Source: publisher figshare collection journal article supplement (https://acs.figshare.com/ndownloader/files/4485205)
Supplement: Supplementary file 1 [file 4485205]

# Selectivity Algorithm for the Formation of two Cryptand/Paraquat Catenanes

Ming Liu, Shijun Li, Menglong Hu, Feng Wang, and Feihe Huang<sup>\*</sup>

*Department of Chemistry, Zhejiang University, Hangzhou 310027, P. R. China*

*Fax: +86-571-8795-1895; Tel: +86-571-8795-3189; Email address:*

*fhuang@zju.edu.cn.*

## Supporting Information (11 pages)

|                                                               |     |
|---------------------------------------------------------------|-----|
| 1. <i>Materials and methods</i>                               | S2  |
| 2. <i>Synthesis of [2]catenane <b>M1</b></i>                  | S3  |
| 3. <i>Synthesis of [2]catenane <b>M2</b></i>                  | S6  |
| 4. <i>Variable-temperature NMR spectra of <b>M2</b></i>       | S9  |
| 5. <i>UV-vis spectra of catenanes <b>M1</b> and <b>M2</b></i> | S10 |
| 6. <i>X-ray crystal data for [2]catenane <b>M1</b></i>        | S10 |
| 7. <i>X-ray crystal data for [2]catenane <b>M2</b></i>        | S10 |

## 1. Materials and methods

Bis(*m*-phenylene)-26-crown-8-based cryptand **H2** was synthesized as shown in Scheme S1,<sup>11b</sup> dibenzo-24-crown-8-based cryptand **H1** was synthesized by a similar route, employing methyl 3,4-dihydroxybenzoate as the starting material.<sup>10b,11a</sup> 1,1'-[1,4-Phenylenebis(methylene)]bis-4,4'-bipyridinium bis(hexafluorophosphate) ([**BBIPYXY**][PF<sub>6</sub>]<sub>2</sub>)<sup>12a</sup> was prepared according to a literature procedure. Solvents were either employed as purchased or dried according to procedures described in the literature. <sup>1</sup>H NMR spectra were collected on a Varian Unity INOVA-400 spectrometer with internal standard TMS. <sup>13</sup>C NMR spectra were recorded on a Bruker AVANCE DMX-500 spectrometer at 125 MHz. Low-resolution electrospray ionization mass spectra (LRESIMS) were performed on a Bruker Esquire 3000 plus mass spectrometer (Bruker-Franzen Analytik GmbH Bremen, Germany) equipped with ESI interface and ion trap analyzer. High-resolution electrospray ionization mass spectra (HRMS) were obtained on a Bruker 7-tesla FT-ICRMS equipped with an electrospray source (Billerica, MA, USA).

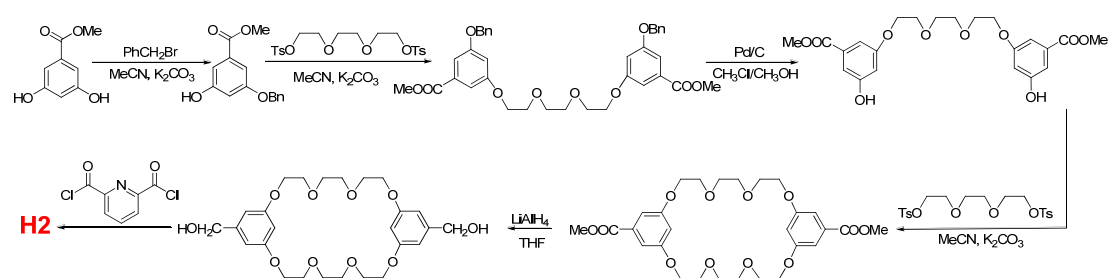

**Scheme 1.** General procedure to synthesize cryptand hosts.

## 2. Synthesis of [2]catenane **M1**

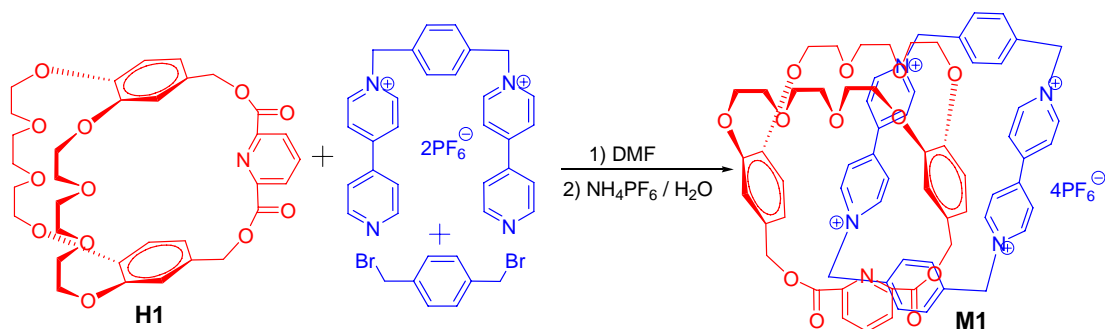

A solution of **[BBIPYXY][PF<sub>6</sub>]<sub>2</sub>** (63.5 mg, 0.09 mmol) in dry DMF (3 mL) was added to a solution of **H1** (120 mg, 0.19 mmol) in dry DMF (3 mL) under N<sub>2</sub> protection. The color of the mixture changed to faint yellow quickly. Then 1,4-bis(bromomethyl)benzene (26.5 mg, 0.09 mmol) in DMF (3 mL) was added to the mixture at room temperature. A red deposit appeared gradually. Then the reaction was stirred at room temperature for 7 days.<sup>S2</sup> The solvent was removed in vacuum. The resultant residue was dissolved in a mixture of MeOH:2 N NH<sub>4</sub>Cl:MeNO<sub>2</sub> (7:2:1) and subjected to column chromatography [SiO<sub>2</sub>: MeOH:2 N NH<sub>4</sub>Cl:MeNO<sub>2</sub> (25:2:1)]. The fractions containing the product (as monitored by TLC) were combined and concentrated under vacuum to give a residue which was dissolved in H<sub>2</sub>O. A deep yellow solid, [2]catenane **M1** (48 mg, 30.6 %), m.p. 267–271 °C, was precipitated from this solution by addition of a saturated aqueous NH<sub>4</sub>PF<sub>6</sub> solution. The proton NMR spectrum of **M1** is shown in Figure S1. <sup>1</sup>H NMR (acetone-*d*<sub>6</sub>, 500 MHz):  $\delta$  9.51–9.34 (m, 10H), 9.03–8.45 (m, 10H), 8.31–7.82 (m, 16H), 6.61 (d, *J* = 8.0 Hz, 1H), 6.44 (s, 1H), 6.33 (d, *J* = 8.0 Hz, 1H), 6.20–5.91 (m, 10H), 5.54 (d, *J* = 11.5 Hz, 1H), 5.13 (d, *J* = 8.0 Hz, 1H), 4.94 (d, *J* = 11.5 Hz, 1H), 4.71–4.63 (m, 2H), 4.40–3.73 (m, 24H). The <sup>13</sup>C NMR spectrum of **M1** is shown in Figure S2. <sup>13</sup>C NMR (125 MHz, acetone-*d*<sub>6</sub>, room temperature):  $\delta$  148.6, 147.1, 146.3, 145.9, 143.5, 136.6, 130.7, 129.6, 127.1, 126.7, 124.2, 108.7, 106.1, 70.8, 70.4, 69.5, 68.4, 67.7, 68.5, 65.2, 64.4, 64.0, 63.3. LRESIMS is shown in Figure S3: *m/z* 1595.0 [**M** – PF<sub>6</sub>]<sup>+</sup> (96%), 725.1 [**M** – 2PF<sub>6</sub>]<sup>2+</sup> (14%). HRMS: *m/z* calcd for [**M** – PF<sub>6</sub>]<sup>+</sup> C<sub>69</sub>H<sub>69</sub>F<sub>18</sub>N<sub>5</sub>O<sub>12</sub>P<sub>3</sub>, 1594.3863, found 1594.3875, error 1.0 ppm; *m/z* calcd for [**M** – 2PF<sub>6</sub>]<sup>2+</sup> C<sub>69</sub>H<sub>69</sub>F<sub>12</sub>N<sub>5</sub>O<sub>12</sub>P<sub>2</sub>, 724.7108, found 724.7112, error 1.0 ppm.

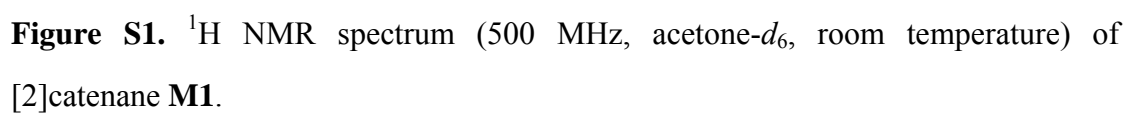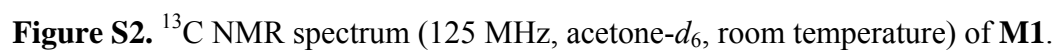

## Display Report

### Analysis Info

|               |                            |                  |                   |
|---------------|----------------------------|------------------|-------------------|
| Analysis Name | 07102329.d                 | Acquisition Date | 10/23/07 17:07:20 |
| Method        | Copy of 070602.MS          | Operator         | Administrator     |
| Sample Name   | LM-2 <i>24C8 Captopril</i> | Instrument       | esquire3000plus   |
| Comment       |                            |                  |                   |

### Acquisition Parameter

|                   |             |              |           |                          |          |
|-------------------|-------------|--------------|-----------|--------------------------|----------|
| Ion Source Type   | ESI         | Ion Polarity | Positive  | Alternating Ion Polarity | off      |
| Mass Range Mode   | Std/Normal  | Scan Begin   | 103 m/z   | Scan End                 | 1900 m/z |
| Capillary Exit    | 280.0 Volt  | Skim 1       | 40.0 Volt | Trap Drive               | 136.2    |
| Accumulation Time | 573 $\mu$ s | Averages     | 8 Spectra | Auto MS/MS               | off      |

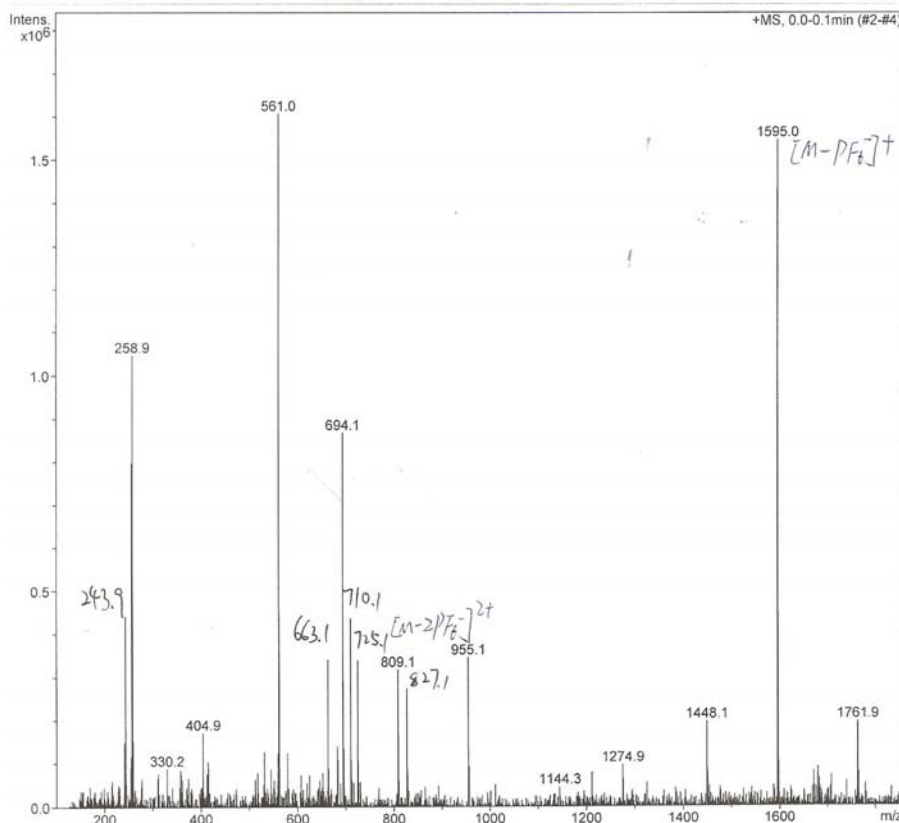

Bruker Daltonics DataAnalysis 3.1

printed: 10/23/07 18:35:29

Page 1 of 1

**Figure S3.** Electrospray ionization mass spectrum of **M1**. Assignment of main peaks:  $m/z$  1595.0  $[M - PF_6]^+$  (96%), 725.1  $[M - 2PF_6]^{2+}$  (14%), 561.0  $[G - CH_2PhCH_2 - PF_6]^+$  (100%).

### 3. Synthesis of [2]catenane **M2**

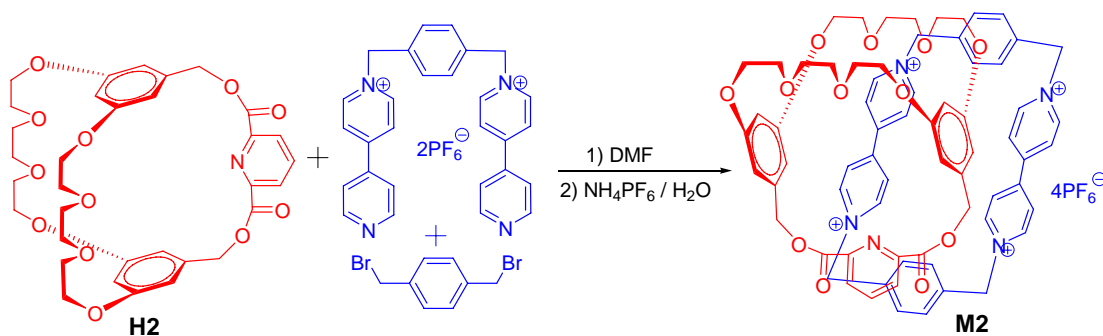

A solution of **[BBIPYXY][PF<sub>6</sub>]<sub>2</sub>** (106 mg, 0.15 mmol) in dry DMF (5 mL) was added to a solution of **H2** (123 mg, 0.19 mmol) in dry DMF (5 mL) under N<sub>2</sub> protection. The color of the mixture changed to faint yellow quickly. Then 1,4-bis(bromomethyl)benzene (44.0 mg, 0.15 mmol) in DMF (5 mL) was added to the mixture at room temperature. A red deposit appeared gradually. Then the reaction was stirred at room temperature for 7 days.<sup>S2</sup> The solvent was removed in vacuum. The resultant residue was dissolved in a mixture of MeOH:2 N NH<sub>4</sub>Cl:MeNO<sub>2</sub> (7:2:1) and subjected to column chromatography [SiO<sub>2</sub>: MeOH:2 N NH<sub>4</sub>Cl:MeNO<sub>2</sub> (25:2:1)]. The fractions containing the product (as monitored by TLC) were combined and concentrated under vacuum to give a residue which was dissolved in H<sub>2</sub>O. A orange solid, [2]catenane **M2** (66 mg, 25.4 %), m.p. 251–253 °C, was precipitated from this solution by addition of a saturated aqueous NH<sub>4</sub>PF<sub>6</sub> solution. The proton NMR spectrum of **M2** is shown in Figure S4. <sup>1</sup>H NMR (acetone-*d*<sub>6</sub>, 500 MHz): δ 10.10 (d, *J* = 8.0 Hz, 1H), 9.61–9.02 (m, 8H), 8.58–7.91 (m, 14H), 7.68 (d, *J* = 7.5 Hz, 1H), 7.27 (d, *J* = 7.5 Hz, 1H), 6.39 (s, 1H), 6.25–5.81 (m, 8H), 5.56–5.52 (m, 8H), 5.39 (1H), 4.38–3.39 (m, 24H). The <sup>13</sup>C NMR spectrum of **M2** is shown in Figure S5. <sup>13</sup>C NMR (125 MHz, acetonitrile-*d*<sub>3</sub>, room temperature): δ 166.2, 165.8, 159.0, 160.1, 156.9, 149.7, 147.2, 146.3, 145.9, 142.5, 135.6, 131.7, 129.5, 127.2, 126.3, 125.6, 106.1, 106.1, 72.8, 71.4, 69.3, 68.4, 67.1, 65.2, 64.0, 63.5. LRESIMS is shown in Figure S6: 725.0 [M – 2PF<sub>6</sub>]<sup>2+</sup> (60%), 1595.5 [M – PF<sub>6</sub>]<sup>+</sup> (16%). HRMS: *m/z* calcd for [M – PF<sub>6</sub>]<sup>+</sup> C<sub>69</sub>H<sub>69</sub>F<sub>18</sub>N<sub>5</sub>O<sub>12</sub>P<sub>3</sub>, 1594.3863, found 1594.3862, error 0.06 ppm; *m/z* calcd for [M – 2PF<sub>6</sub>]<sup>2+</sup> C<sub>69</sub>H<sub>69</sub>F<sub>12</sub>N<sub>5</sub>O<sub>12</sub>P<sub>2</sub>, 724.7108, found 724.7106, error 0.3 ppm.

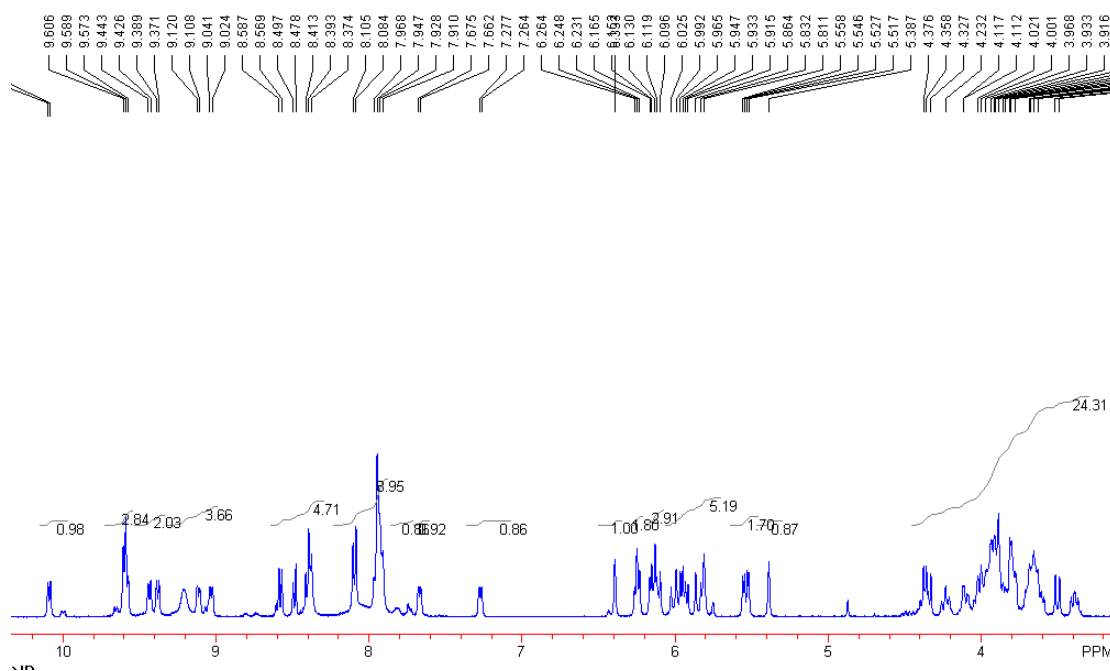

**Figure S4.**  $^1\text{H}$  NMR spectrum (500 MHz, acetone- $d_6$ , room temperature) of **M2**.

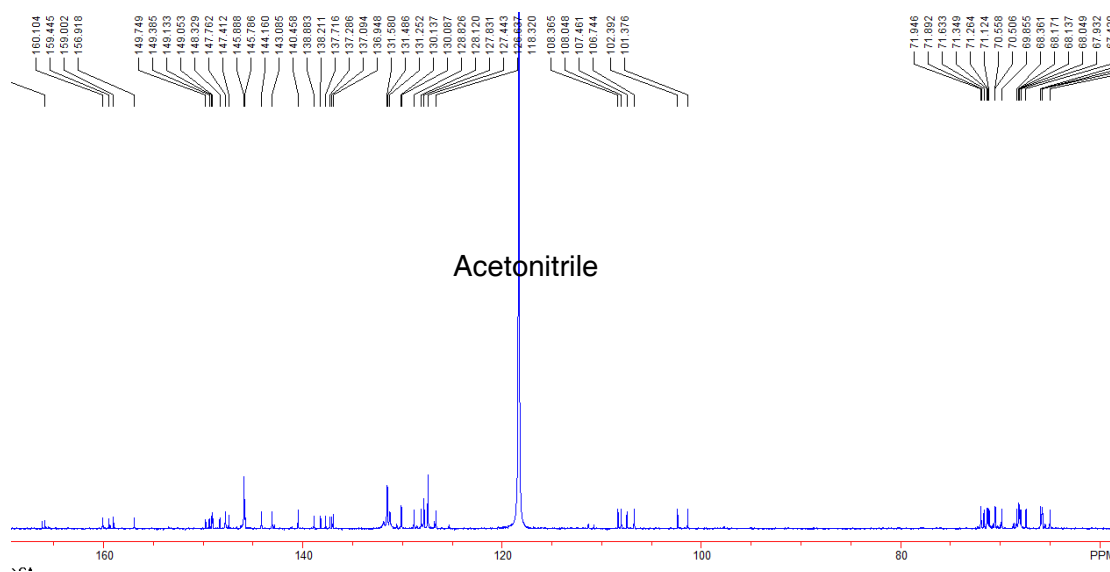

**Figure S5.**  $^{13}\text{C}$  NMR spectrum (125 MHz, acetonitrile- $d_3$ , room temperature) of **M2**.

Spectrum 1A Plot - 2009-3-26 21:37

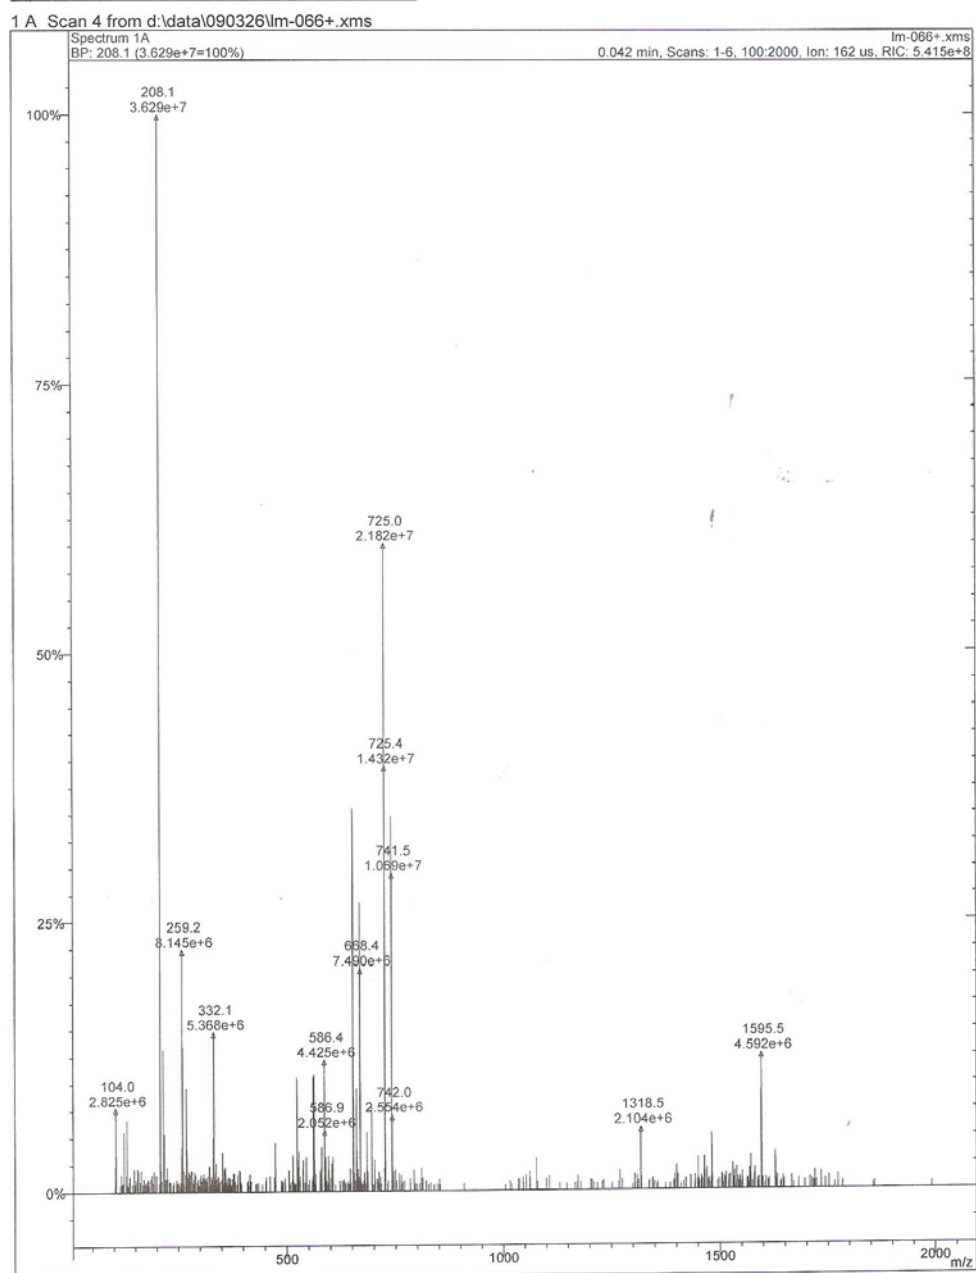

**Figure S6.** Electrospray ionization mass spectrum of **M2**. Assignment of main peaks:  
 $m/z$  1595.5 [**M2** – PF<sub>6</sub>]<sup>+</sup> (14%), 725.0 [**M2** – 2PF<sub>6</sub>]<sup>2+</sup> (60%).

#### 4. Variable-temperature NMR spectra of **M2**

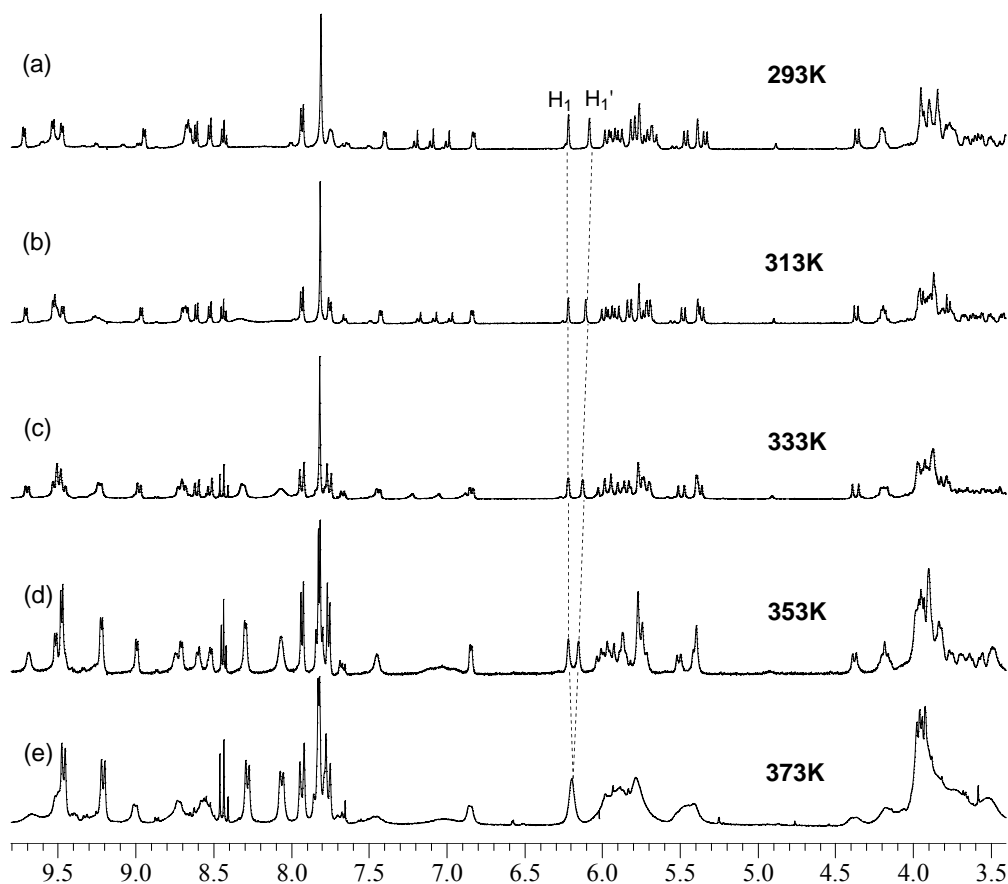

**Figure S7.** Partial temperature-dependent <sup>1</sup>H NMR spectra of **M2** recorded in DMSO-*d*<sub>6</sub> at (a) 20 °C, (b) 40 °C, (c) 60 °C, (d) 80 °C, (e) 100 °C.

Two rotational temperature-dependent processes of related catenanes have been identified by Stoddart et al.<sup>S1</sup> Their corresponding activation barriers can be calculated using the “coalescence method”.<sup>S2</sup> We also supposed that there are two possible dynamic processes in **M2**: a pirouetting process of the ethylene glycol chains of the cryptand around the cyclophane **G**, and the exchange process of the two bipyridinium units of cyclophane **G**. We investigated the protons (H<sub>1</sub>, H<sub>1</sub>') at around 6.2 ppm, which was attributed to the “inside” and “alongside” protons on the benzene rings of the cryptand host. The coalescence temperature (100 °C) and frequency difference of exchanging sets of signals were used to calculate the activation barrier. The calculated activation barrier (19.3 kcal·mol<sup>-1</sup>) was related to the process of the ethylene glycol chains around the cyclophane **G**.

## 5. UV-vis spectra of catenanes **M1** and **M2**

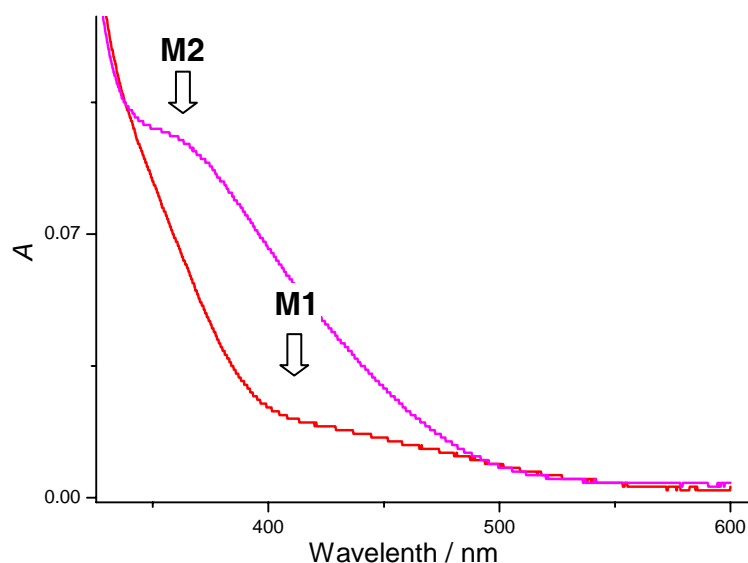

**Figure S8.** UV-vis spectra of catenanes **M1** ( $3 \times 10^{-5}$  M) and **M2** ( $3 \times 10^{-5}$  M) in MeCN, showing the charge-transfer absorption maxima at  $\lambda = 410$  nm ( $\epsilon = 640$  M<sup>-1</sup>·dm<sup>-1</sup>) and  $\lambda = 352$  nm ( $\epsilon = 3080$  M<sup>-1</sup>·dm<sup>-1</sup>), respectively.

## 6. X-ray crystal data for [2]catenane **M1**

Crystallographic data: red, C<sub>77</sub>H<sub>81</sub>F<sub>24</sub>N<sub>9</sub>O<sub>12</sub>P<sub>4</sub>, *FW* 1904.39, triclinic, space group *P1*,  $a = 13.474(3)$ ,  $b = 13.507(3)$ ,  $c = 14.013(3)$  Å,  $\alpha = 103.97^\circ$ ,  $\beta = 99.34(3)^\circ$ ,  $\gamma = 118.61(3)^\circ$ ,  $V = 2053.8(7)$  Å<sup>3</sup>,  $Z = 1$ ,  $D_c = 1.540$  g cm<sup>-3</sup>,  $T = 293$  K,  $\mu = 0.213$  mm<sup>-1</sup>, 11899 measured reflections, 8133 independent reflections, 1139 parameters, 3 restraints,  $F(000) = 978$ ,  $R_1 = 0.1095$ ,  $wR_2 = 0.1228$  (all data),  $R_1 = 0.0689$ ,  $wR_2 = 0.1090$  [ $I > 2\sigma(I)$ ], max. residual density 0.334 e·Å<sup>-3</sup>, and goodness-of-fit ( $F^2$ ) = 1.051.

## 7. X-ray crystal data for [2]catenane **M2**

Crystallographic data: orange, C<sub>83</sub>H<sub>90</sub>F<sub>24</sub>N<sub>12</sub>O<sub>13</sub>P<sub>4</sub>, *FW* 2043.53, monoclinic, space group *P 2<sub>1</sub>/c*,  $a = 26.682(5)$ ,  $b = 16.661(3)$ ,  $c = 21.761(4)$  Å,  $\alpha = 90^\circ$ ,  $\beta = 106.67(3)^\circ$ ,  $\gamma = 90^\circ$ ,  $V = 9267(3)$  Å<sup>3</sup>,  $Z = 4$ ,  $D_c = 1.465$  g cm<sup>-3</sup>,  $T = 293$  K,  $\mu = 0.196$  mm<sup>-1</sup>, 15354 measured reflections, 9897 independent reflections, 1234 parameters, 0 restraints,

$F(000) = 4208.000$ ,  $R_1 = 0.1329$ ,  $wR_2 = 0.2988$  (all data),  $R_1 = 0.0989$ ,  $wR_2 = 0.2633$  [ $I > 2\sigma(I)$ ], max. residual density  $1.125 \text{ e}\cdot\text{\AA}^{-3}$ , and goodness-of-fit ( $F^2$ ) = 1.100. In **M2**, the atom O50 on the isolated water molecule has a relative high thermal parameter (0.51), which means it vibrates at a large scale. Therefore the hydrogen atoms on O50 would have an even larger vibration scale. Therefore, we didn't add hydrogen atoms on it.

#### References:

- S1. Anelli, P. L.; Ashton, P. R.; Ballardini, R.; Balzani, V.; Delgado, M.; Gandolfi, M. T.; Goodnow, T. T.; Kaifer, A. E.; Philp, D.; Pietraszkiewicz, M.; Prodi, L.; Reddington, M. V.; Slwain, A. M. Z.; Spencer, N.; Stoddart, J. F.; Vicent, C.; Williams, D. J. *J. Am. Chem. Soc.* **1992**, *114*, 193–218.
- S2. (a) Sutherland, I. O. *Annu. Rep. NMR Spectrosc.* **1971**, *4*, 71–235. (b) Friebolin, H. P. *Basic 1D and 2D NMR Spectroscopy*; VCH Publishers: New York, 1991; Chapter 11, pp 271–272.
